# Supplementary material
Source: PubMed Central journal article supplement (PMC4817795)
Supplement: mt201567x1.pdf [file mt201567x1.pdf]

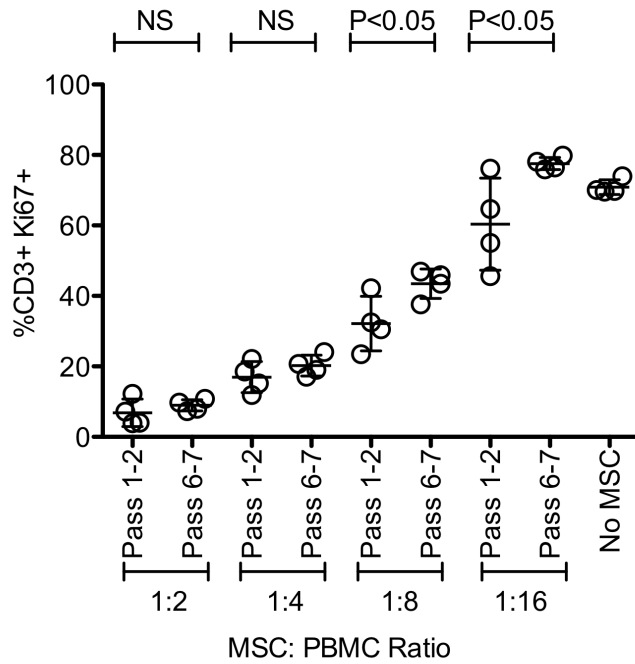

**Supplementary Figure 1: Suppressive potential of IBD MSCs derived from early vs late passage.** Early vs Late passage MSCs (derived from patients CD05, CD07, UC08, CD09) were cocultured with SEB stimulated PBMCs from a healthy donor at the indicated concentrations. T cell proliferation (%CD3+Ki67+) is represented with mean  $\pm$ SD. Two-tailed T test was performed to obtain the P Values in Prism software.

A

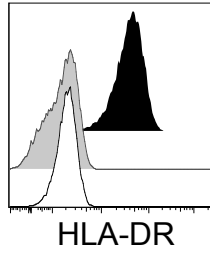

□ No PBMCs  
 ■ Resting PBMCs  
 ■ Activated PBMCs

B

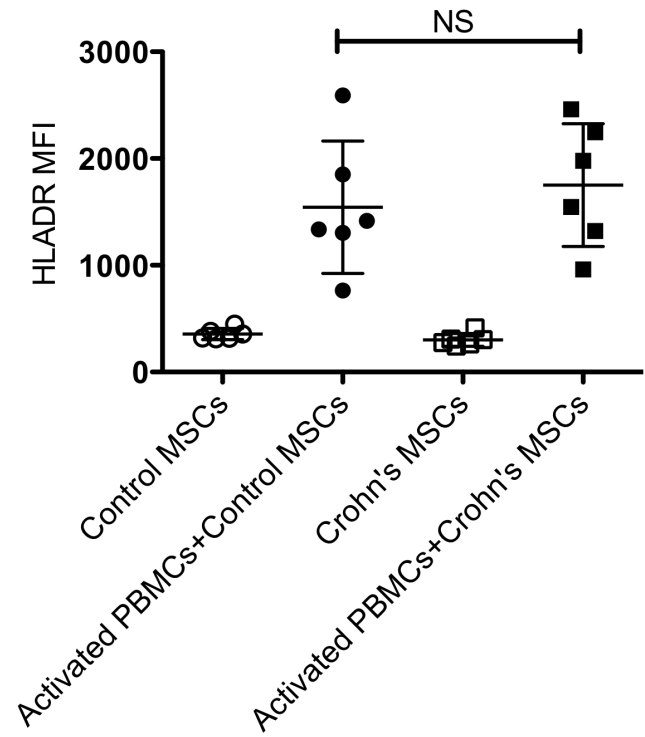

**Supplementary Figure 2: HLADR induction by activated T cells in Crohn's MSCs.**

(A) Representative and (B) Cumulative Mean Fluorescence Intensity of HLADR expression on Crohn's and healthy MSCs induced by activated T cells is shown.

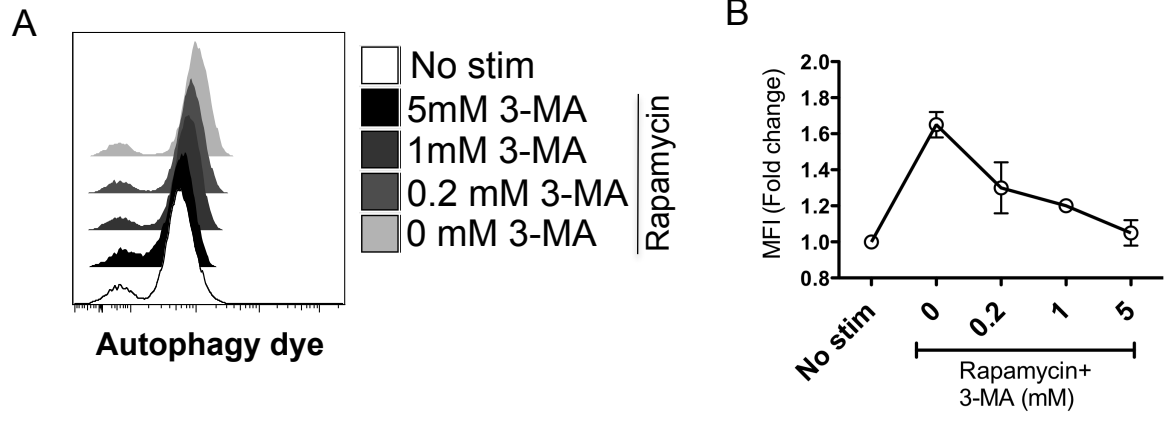

**Supplementary Figure 3: 3MA blocks autophagy activity.** HeLa cells were stimulated with 250nmol/l Rapamycin in the presence of variable 3- Methyl Adenine concentrations and autophagy influx was measured under flow cytometry. (A) Representative and (B) Cumulative of two independent experiments is shown.

| <b>Table S1: Clinical trials of MSCs for Luminal and Fistular Crohn's Disease</b> |     |     |    |        |      |         |     |       |                 |                                    |
|-----------------------------------------------------------------------------------|-----|-----|----|--------|------|---------|-----|-------|-----------------|------------------------------------|
| NCT ID                                                                            | MSC |     |    | Source |      | Crohn's |     | Phase | Location        | Sponsor                            |
|                                                                                   | BM  | ASC | UC | Auto   | Allo | Lu      | Fis |       |                 |                                    |
| 00543374*<br>01233960<br>01510431<br>00482092                                     | X   |     |    |        | X    | X       |     | III   | USA             | Mesoblast, Ltd.                    |
| 01090817                                                                          | X   |     |    |        | X    | X       |     | II    | Australia       | Royal Perth Hospital               |
| 00294112*                                                                         | X   |     |    |        | X    | X       |     | II    | USA             | Osiris Therapeutics, Inc.          |
| 01540292                                                                          | X   |     |    |        | X    | X       |     | I     | Belgium         | University Hospital of Liege       |
| 02150551                                                                          | X   |     |    |        | X    | X       |     | I     | USA             | Children's National Medical Center |
| NTR1360**                                                                         | X   |     |    | X      |      | X       |     | I     | Netherlands     | Leiden University Medical Center   |
| 01659762                                                                          | X   |     |    | X      |      | X       |     | I     | USA             | Emory University                   |
| 02000362                                                                          |     |     | X  |        | X    | X       |     | II    | South Korea     | Kang Stem Biotech Co., Ltd         |
| 01541579                                                                          |     | X   |    |        | X    |         | X   | III   | Europe & Israel | Cellerix (TiGenix S.A.U.)          |
| 01314092<br>01623453                                                              |     | X   |    | X      |      |         | X   | II    | South Korea     | Anterogen Co., Ltd.                |
| 01157650                                                                          |     | X   |    | X      |      |         | X   | I     | Spain           | Universidad de Navarra             |
| 01915927                                                                          |     | X   |    | X      |      |         | X   | I     | USA             | Mayo Clinic                        |
| 01874015                                                                          | X   |     |    | X      |      |         | X   | I     | Iran            | Royan Institute                    |
| 01144962                                                                          | X   |     |    |        | X    |         | X   | I     | Netherlands     | Leiden University Medical Center   |

\*: Completed study. \*\*: Registered in the Netherlands National Trial Register. BM: Bone Marrow MSC, ASC: Adipose-Derived Stem Cells, UC: Umbilical cord, Auto: Autologous, Allo: Allogeneic, Lu: Luminal, Fis: Fistular, Ph: Phase

**Table S2: IBD Patient Characteristics**

| Patient          | Sex | Age | Disease | Histology |          |         |           |        |               |            |           |            |         |       |        |
|------------------|-----|-----|---------|-----------|----------|---------|-----------|--------|---------------|------------|-----------|------------|---------|-------|--------|
|                  |     |     |         | Ileum     | Duodenum | Stomach | Esophagus | Rectum | Recto sigmoid | Colon      |           |            |         |       |        |
|                  |     |     |         |           |          |         |           |        |               | Descending | Ascending | Transverse | Sigmoid | Cecum | Random |
| CD1              | M   | 11  | CD      | +         | NA       | NA      | NA        | NA     | NA            | NA         | NA        | NA         | NA      | NA    | NA     |
| CD2              | M   | 15  | CD      | NA        | -        | +       | -         | -      | NA            | +          | NA        | NA         | +       | NA    | NA     |
| CD3              | M   | 14  | CD      | NA        | NA       | NA      | NA        | +      | NA            | +          | +         | +          | NA      | NA    | NA     |
| CD4              | F   | 16  | CD      | NA        | +        | +       | -         | NA     | +             | +          | -         | NA         | NA      | +     | NA     |
| CD5 <sup>a</sup> | F   | 18  | CD      | -         | NA       | NA      | NA        | NA     | NA            | NA         | NA        | NA         | NA      | -     | -      |
| CD7              | F   | 16  | CD      | NA        | -        | +       | +         | +      | NA            | +          | NA        | NA         | +       | NA    | NA     |
| UC8 <sup>b</sup> | M   | 13  | UC      | -         | -        | +       | -         | +      | NA            | +          | +         | +          | -       | +     | NA     |
| CD9 <sup>c</sup> | M   | 16  | CD      | +         | NA       | NA      | NA        | -      | NA            | -          | +         | +          | +       | -     | NA     |
| CD10             | M   | 17  | CD      | +         | NA       | NA      | +         | NA     | NA            | NA         | NA        | NA         | NA      | NA    | +      |
| CD11             | F   | 18  | CD      | NA        | -        | -       | +         | NA     | +             | +          | +         | +          | +       | +     | NA     |

<sup>a</sup>Despite an increase in lamina propria mixed inflammatory infiltrate, there is no convincing evidence of chronic or active colitis. Given the previous biopsy findings, this may represent a resolving colitis. <sup>b</sup>The findings are consistent with a chronic inflammatory bowel disease, favoring ulcerative colitis. <sup>c</sup>Architectural distortion is not identified in any of the biopsies. However, several specimens demonstrate increased eosinophils in the lamina propria, a finding which may be seen in very early phase inflammatory bowel disease. + Inflammation, – No active inflammation, NA Specimen not available.

**Table S3. Genes significant to MSC immunobiology, biodistribution and regeneration**

|                                 |                                                                                                                                                                                                                                                                                                                                                                                                                                                                                                                                                                                                                                                                                                                                                                                                                                                                                                                                                                                                                                                                                  |
|---------------------------------|----------------------------------------------------------------------------------------------------------------------------------------------------------------------------------------------------------------------------------------------------------------------------------------------------------------------------------------------------------------------------------------------------------------------------------------------------------------------------------------------------------------------------------------------------------------------------------------------------------------------------------------------------------------------------------------------------------------------------------------------------------------------------------------------------------------------------------------------------------------------------------------------------------------------------------------------------------------------------------------------------------------------------------------------------------------------------------|
| <p><b>Immunobiology</b></p>     | <p>A20 (Tumor necrosis factor, alpha-induced protein 3)<br/> AHR (Aryl hydrocarbon receptor)<br/> CCL2 (chemokine (C-C motif) ligand 2)<br/> CCL5 (Chemokine (C-C motif) ligand 5)<br/> CCL7 (Chemokine (C-C motif) ligand 7)<br/> CD46 (complement regulatory protein)<br/> CD55 (Complement decay-accelerating factor)<br/> CIITA (Class II, major histocompatibility complex, transactivator)<br/> COX-2 (Cyclooxygenase-2)<br/> CXCL10 (Chemokine (C-X-C motif) ligand 10)<br/> CXCL11 (Chemokine (C-X-C motif) ligand 11)<br/> CXCL9 (Chemokine (C-X-C motif) ligand 9)<br/> Gal-1 (Galectin-1)<br/> HLA-DR (MHC-II)<br/> HLA-G5 (Histocompatibility antigen, class I, G)<br/> HO-1 (Heme oxygenase 1)<br/> IDO (Indoleamine 2,3-dioxygenase)<br/> IL-6 (Interleukin 6)<br/> IL8 (Interleukin 8)<br/> PDL1 (Programmed death-ligand 1)<br/> PDL2 (Programmed death-ligand 2)<br/> TGF-B (Transforming growth factor)<br/> TLR3 (Toll-like receptor 3)<br/> TLR4 (Toll-like receptor 4)<br/> TRAIL (TNF-related apoptosis-inducing ligand )<br/> ULBP-3 (NKG2D ligand 3)</p> |
| <p><b>Homing and Repair</b></p> | <p>ANGPT2 (Angiopoietin-2)<br/> Bcl-2 (B-cell lymphoma 2)<br/> CCR10 (C-C chemokine receptor type 10)<br/> CX3CR1 (CX3C chemokine receptor 1)<br/> CXCL12 (stromal cell-derived factor 1)<br/> CXCR1 (C-X-C chemokine receptor type 1)<br/> CXCR4 (C-X-C chemokine receptor type 4)<br/> CXCR6 (chemokine (C-X-C motif) receptor 6)<br/> CXCR6 (Chemokine (C-X-C motif) receptor 6)<br/> HGF (Hepatocyte growth factor)<br/> HSP70A (heat shock protein 70A)<br/> HSP70B (heat shock protein 70B)<br/> ICAM-1 (Intercellular Adhesion Molecule 1)<br/> KGF (Keratinocyte Growth Factor)<br/> TIMP-1 (TIMP metalloproteinase inhibitor 1)<br/> TIMP-2 (TIMP metalloproteinase inhibitor 2)<br/> TSG-6 (Tumor necrosis factor-inducible gene 6)<br/> VCAM-1 (Vascular cell adhesion protein 1)</p>                                                                                                                                                                                                                                                                                 |
